# Supplementary material for: Mycobacterium chimaera in Heater–Cooler Units in Denmark Related to Isolates from the United States and United Kingdom
Source: Emerg Infect Dis. 2017 Mar;23(3):507–9. doi: 10.3201/eid2303.161941 (PMC5382728; doi:10.3201/eid2303.161941)
Supplement: Technical Appendix — Materials and methods, whole-genome sequencing information on Mycobacterium chimaera isolates, and quantitative culture plates showing growth of isolates on filters. [file 16-1941-Techapp-s1.pdf]

# *Mycobacterium chimaera* in Heater–Cooler Units in Denmark Related to Isolates from the United States and United Kingdom

## Technical Appendix

### Sampling

Statens Serum Institut, the Danish Patient Safety Authority, and the Danish Medicines Agency decided to investigate all Denmark heater–cooler units (HCUs) and to increase the awareness of symptoms of *M. chimaera* infections in patients who had undergone open chest heart surgery previously. The 5 local hospital's infection prevention and control units, surgeons, perfusionists, and other relevant staff were specifically recruited, participated in network meetings, and were provided with instructions on how to sample water and biofilm from the HCUs. In return, Statens Serum Institut and the Danish Medicines Agency gained helpful information on the number and models of HCUs used throughout the country.

Samples were collected from all the HCUs located in thoracic surgery departments (n = 5) throughout the country. The departments were instructed to submit 1 L of water from each tank for the detection of planktonic mycobacteria, as well as provide swabs from the inner surfaces of tube mouths from each HCU for the detection of mycobacteria in the biofilm.

### Culture

Each 1-L water sample was divided into 3 aliquots. All 3 were concentrated by centrifugation at  $3,000 \times g$  in a Sorvall RC 6 Plus Centrifuge (Thermo Fisher Scientific, Waltham, MA, USA), followed by removal of the supernatant. The sediments were decontaminated separately using N-acetyl-cysteine and 2% NaOH (Mycoprep, Becton Dickinson, Sparks, MD, USA) for 10 min, neutralized with phosphate buffer (pH 6.8), and centrifuged for 15 min at 3,700 rpm in a Heraeus Multifuge 3SR+ (Thermo Fisher Scientific Waltham, MA, USA). Then supernatants were removed, leaving  $\approx 1.5$  mL of sediment. Two of

the 3 sediment aliquots were used for qualitative culture and the remaining aliquot for quantitative culture on a filter. A portion from each of the 2 aliquots was inoculated separately into a mycobacterium growth indicator tube (Becton Dickinson, Sparks, MD, USA) and a Löwenstein-Jensen tube (SSI Diagnostica, Copenhagen, Denmark). The remaining portion of the 2 aliquots were kept in the refrigerator as a backup if the culture was contaminated. The third aliquot was frozen for later quantitative culture. To quantitate, the frozen aliquots were thawed and diluted with 100 mL of phosphate buffer and passed through a MicroFunnel 300 black membrane filter with a 0.45-µm pore size (Pall Corporation, Westborough, MA, USA). The filter was put on Middlebrook 7H11 agar and incubated at 30°C for 8 weeks.

## Identification

The growing mycobacteria were identified using GenoType CM line probe assay (Hain Lifescience, Nehren, Germany) as a screening test. If the test result was positive for *M. intracellulare*, we then performed internal transcribed spacer (ITS) sequencing (1,2).

Five microliters of DNA (extracted from cells with heat inactivation and sonication) was amplified and hybridized with GenoType CM kit (Hain Lifescience) according to the instructions from the manufacturer. Initial PCR for ITS sequencing was done with a 5 µL sample of DNA in a 50 µL reaction containing 5 µL 10× PCR buffer, 10 µL 5× Q-solution, 2 µL 25 mM MgCl<sub>2</sub>, 1 µL 10 µM primer ITS\_F, 1 µL 10 µM primer ITS\_R (1,2), 0.25 µL HotStarTaq (HotStarTaq Master Mix Kit; QIAGEN, Hilden, Germany), and water (DNase, RNase, and protease free). The thermal profile involved a denaturation step of 95°C for 15 min; 40 cycles of 95°C for 60 s, 59°C for 60 s, and 72°C for 60 s; a final extension at 72°C for 10 min; and a cool down at 4°C. The sequencing was performed using the Big Dye Terminator v1.1 Cycle Sequencing Kit (Applied Biosystems, ThermoFisher Scientific, Waltham, MA, USA) according to the manufacturer's protocol. Sequence analysis was performed using Sequencing Analysis Software v.5.3.1 (Applied Biosystems).

## Whole-Genome Sequencing

In brief, 1 mL of a culture enriched in Dubos broth (SSI Diagnostika, Hilleroed, Denmark) was centrifuged at 13,000 rpm for 10 min, the supernatant removed, and the pellet

resuspended in 300  $\mu$ L TE buffer (0.01 M Tris-HCl, 0.001 M EDTA, pH 8.0). The resuspended pellets were heated at 80°C for 20 min to kill the cells and incubated with 50  $\mu$ L of 10 mg/mL lysozyme for 24 h at 37°C on a Thermomixer C (Eppendorf, Hamburg, Germany). Then 70  $\mu$ L of 10% sodium dodecyl sulfate and 5  $\mu$ L of 10 mg/mL proteinase K were added, and the mixture was incubated for 10 min at 65°C. Next, 100  $\mu$ L of 5 M NaCl and 100  $\mu$ L of N-cetyl-N,N,N-trimethyl ammonium bromide/NaCl was added. The tubes were vortexed briefly and incubated for 10 min at 65°C. An equal volume of chloroform/isoamyl alcohol (24:1, vol/vol) was added, the mixture was vortexed for 10 s, and centrifuged at 13,000 rpm for 10 min. Afterwards, 0.6 volume of isopropanol was added to the supernatant to precipitate the DNA. The tubes were left overnight at -20°C and centrifuged for 15 min; the pellet was washed once with 70% ethanol, air-dried, and redissolved in 20  $\mu$ L of TE buffer.

DNA was normalized to a concentration of 0.5 ng/ $\mu$ L using a Biomek NX Lab Automation Workstation (Beckman Coulter, Indianapolis, IN, USA). DNA libraries were generated using a Nextera XT DNA preparation kit (Illumina, Inc., San Diego, CA, USA) according to the manufacturer's instructions but diluted an extra 4-fold before being loaded on to the NextSeq 500 platform (Illumina Inc.) with 2  $\times$  150 bp paired-end chemistry.

Paired-end Illumina reads were end-trimmed (base-quality >Q3; minimum end-trimmed length >35 bp) and filtered using Trimmomatic (<http://www.usadellab.org/cms/?page=trimmomatic>), and mapped to the 5.8 Mbp *M. chimera* FI-01069 chromosome sequence (accession no. PRJNA324238) using the Burrows-Wheeler Alignment tool bwa (<http://bio-bwa.sourceforge.net/>) (see Technical Appendix Table for an overview of mapped samples used in this study). Variant calling was performed with SAMtools and BCFtools (<http://www.htslib.org/>) (3). Single-nucleotide polymorphisms (SNPs) were filtered according to the following criteria: having a phred-scaled variant calling quality exceeding 20 (<http://gatkforums.broadinstitute.org/gatk/discussion/4260/phred-scaled-quality-scores>) and being supported by  $\geq 5$  reads with a frequency of 85% in  $\geq 1$  sample. However, to minimize the influence of horizontal gene transfer, regions in which  $\geq 3$  SNPs occurred together within 100 bp were excluded from the analysis. For individual samples, SNPs were considered as fixated if they were supported by  $\geq 3$  reads with a SNP-frequency above 70%, or otherwise called the reference, unless present in  $\geq 5$  other samples. Phylogenetic comparison of concatenated SNPs was performed with the Seaview program (4) by using the built-in maximum parsimony

function (Dnapars, <http://evolution.genetics.washington.edu/phyliip/doc/dnapars.html>). Branch support values were calculated using 100 bootstrap replicates. A distance matrix was created by importing the generated SNP alignment in FASTA format (<http://zhanglab.ccmb.med.umich.edu/FASTA/>) into the statistics software RStudio (v1.0.44) (<https://www.rstudio.com/>) using the Analyses of Phylogenetics and Evolution package (<http://ape-package.ird.fr/>) to calculate pairwise sample distances.

**Technical Appendix Table.** Overview of whole-genome sequencing of *Mycobacterium chimaera* isolated from heater-cooler units (HCUs) and patients, Denmark, July–October 2015\*

| Sample name  | Study accession no. | Run accession no.         | Country  | Collection date | Isolation source | No. trimmed reads | Reads mapped, % | FI-01069 coverage, X |
|--------------|---------------------|---------------------------|----------|-----------------|------------------|-------------------|-----------------|----------------------|
| DK_HCU_A3    | PRJEB18427          | ERR1744899                | DK       | 2015 Jul 15     | HCU (3T)         | 422,370           | 88.3            | 9                    |
| DK_HCU_B1    | PRJEB18427          | ERR1744900                | DK       | 2015 Aug 8      | HCU (3T)         | 2,916,088         | 88.7            | 61                   |
| DK_HCU_C1    | PRJEB18427          | ERR1744901;<br>ERR1744902 | DK       | 2015 Jul 28     | HCU (3T)         | 2,011,606         | 87.7            | 41                   |
| DK_HCU_D5    | PRJEB18427          | ERR1744903                | DK       | 2015 Oct 1      | HCU (3T)         | 1,552,694         | 85.9            | 32                   |
| DK_HCU_E4    | PRJEB18427          | ERR1744904                | DK       | 2015 Oct 1      | HCU (Maquet)     | 1,850,980         | 87.4            | 39                   |
| DK_PAT_1     | PRJEB18427          | ERR1744905                | DK       | 2015 Jul 13     | BAL              | 1,034,652         | 90.0            | 23                   |
| FI-01069     | PRJEB18427          | ERR1744906                | IT       | 2001            | BAL              | 1,636,840         | 96.1            | 37                   |
| IRL_PAT_1    | PRJNA294775         | SRR2338871                | IRL      | 2009            | Sputum           | 3,466,168         | 92.5            | 52                   |
| IRL_PAT_2    | PRJNA294775         | SRR2338873                | IRL      | 2013            | Sputum           | 4,040,276         | 96.4            | 81                   |
| IRL_PAT_3    | PRJNA294775         | SRR2338874                | IRL      | 2014            | BAL              | 3,334,536         | 90.3            | 70                   |
| UK_HCU_WAT_1 | PRJNA324238         | SRR4068047                | UK       | 2015            | HCU (Unknown)    | 2,122,042         | 90.3            | 46                   |
| UK_HCU_WAT_2 | PRJNA324238         | SRR4119603                | UK       | 2015            | HCU (Unknown)    | 2,642,246         | 92.5            | 39                   |
| UK_HCU_WAT_3 | PRJNA324238         | SRR4119606                | UK       | 2015            | HCU (Unknown)    | 3,459,964         | 87.2            | 49                   |
| UK_HCU_WAT_4 | PRJNA324238         | SRR4119612                | UK       | 2015            | HCU (Unknown)    | 2,753,690         | 92.6            | 41                   |
| UK_HCU_WAT_5 | PRJNA324238         | SRR4119617                | UK       | 2015            | HCU (Unknown)    | 2,762,350         | 92.3            | 41                   |
| UK_HCU_WAT_6 | PRJNA324238         | SRR4119619                | UK       | 2015            | HCU (Unknown)    | 2,604,538         | 93.0            | 39                   |
| UK_HCU_WAT_7 | PRJNA324238         | SRR4119623                | UK       | 2015            | HCU (Unknown)    | 7,623,682         | 88.2            | 104                  |
| UK_HCU_WAT_8 | PRJNA324238         | SRR4119656                | UK       | 2015            | HCU (Unknown)    | 5,384,290         | 91.2            | 79                   |
| US_PA_HCU_1  | PRJNA344472         | SRR4295156                | USA (PA) | 2015 Jul 25     | HCU (3T)         | 2,514,644         | 94.5            | 90                   |
| US_PA_HCU_2  | PRJNA344472         | SRR4295157                | USA (PA) | 2015            | HCU (3T)         | 1,996,066         | 88.0            | 65                   |
| US_PA_PAT_1  | PRJNA344472         | SRR4295158                | USA (PA) | 2015 May 1      | Human            | 2,472,668         | 94.5            | 90                   |
| US_PA_HCU_3  | PRJNA344472         | SRR4295159                | USA (PA) | 2015 Oct 30     | HCU (3T)         | 2,861,298         | 90.3            | 97                   |
| US_PA_PAT_2  | PRJNA344472         | SRR4295160                | USA (PA) | 2015 Sep 11     | Human            | 2,934,922         | 94.7            | 106                  |
| US_PA_PAT_3  | PRJNA344472         | SRR4295161                | USA (PA) | 2015 Nov 6      | Human            | 2,184,438         | 91.1            | 77                   |
| US_PA_PAT_4  | PRJNA344472         | SRR4295162                | USA (PA) | 2016 Feb 3      | Human            | 2,636,322         | 91.4            | 94                   |
| US_PA_PAT_5  | PRJNA344472         | SRR4295163                | USA (PA) | 2016 Mar 21     | Human            | 2,112,644         | 90.9            | 76                   |
| US_PA_HCU_4  | PRJNA344472         | SRR4295164                | USA (PA) | 2015            | HCU (3T)         | 3,176,156         | 90.0            | 108                  |
| US_PA_HCU_5  | PRJNA344472         | SRR4295165                | USA (PA) | 2015            | HCU (3T)         | 3,143,036         | 93.6            | 110                  |
| US_PA_HCU_6  | PRJNA344472         | SRR4295166                | USA (PA) | 2015            | HCU (3T)         | 2,731,838         | 94.6            | 99                   |
| US_PA_PAT_6  | PRJNA344472         | SRR4295167                | USA (PA) | 2015 Jun 15     | Human            | 3,030,308         | 93.9            | 109                  |
| US_PA_PAT_7  | PRJNA344472         | SRR4295168                | USA (PA) | 2014 Jul 24     | Human            | 2,595,368         | 94.7            | 94                   |
| US_PA_PAT_8  | PRJNA344472         | SRR4295169                | USA (PA) | 2014 May 20     | Human            | 2,309,386         | 94.4            | 84                   |
| US_PA_HCU_7  | PRJNA344472         | SRR4295170                | USA (PA) | 2015 Aug 19     | HCU (3T)         | 2,139,370         | 86.8            | 72                   |
| US_PA_PAT_9  | PRJNA344472         | SRR4295171                | USA (PA) | 2015 Jan 28     | Human            | 2,115,298         | 87.9            | 72                   |
| US_IA_PAT_1  | PRJNA345021         | SRR4324922                | USA (IA) | 2015 Nov 11     | Blood            | 1,230,194         | 95.4            | 44                   |
| US_UA_PAT_2  | PRJNA345021         | SRR4324923                | USA (IA) | 2016 Feb 8      | Blood            | 2,087,698         | 92.7            | 89                   |
| US_IA_HCU_1  | PRJNA345021         | SRR4324924                | USA (IA) | 2016 Jan 28     | HCU (3T)         | 1,173,912         | 87.0            | 43                   |
| US_IA_HCU_2  | PRJNA345021         | SRR4324925                | USA (IA) | 2016 Apr 13     | HCU (3T)         | 1,524,522         | 93.5            | 72                   |

\*DK, Denmark; HCU, heater-cooler unit; IA, Iowa; IRL, Ireland; IT, Italy; PA, Pennsylvania; PAT, patient; WAT, water.

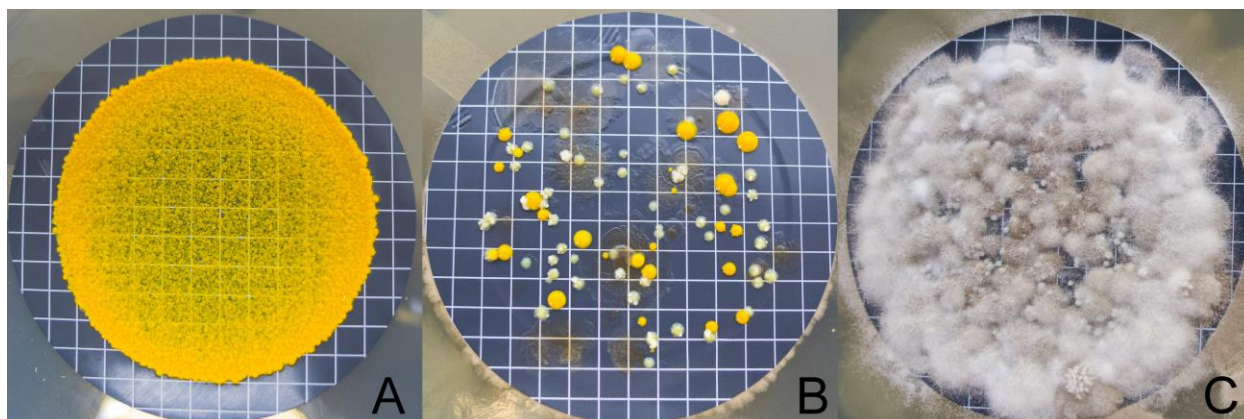

**Technical Appendix Figure.** Quantitative culture of filtered water from heater–cooler units. The images show filters with (A) >1,000 CFU/L, (B) 300 CFU/L with some contamination from other bacteria, and (C) heavy overgrowth of mold.

## References

1. De Smet KA, Brown IN, Yates M, Ivanyi J. Ribosomal internal transcribed spacer sequences are identical among *Mycobacterium avium*-intracellulare complex isolates from AIDS patients, but vary among isolates from elderly pulmonary disease patients. *Microbiology*. 1995;141:2739–47. [PubMed http://dx.doi.org/10.1099/13500872-141-10-2739](http://dx.doi.org/10.1099/13500872-141-10-2739)
2. Frothingham R, Wilson KH. Sequence-based differentiation of strains in the *Mycobacterium avium* complex. *J Bacteriol*. 1993;175:2818–25. [PubMed http://dx.doi.org/10.1128/jb.175.10.2818-2825.1993](http://dx.doi.org/10.1128/jb.175.10.2818-2825.1993)
3. Li H. A statistical framework for SNP calling, mutation discovery, association mapping and population genetical parameter estimation from sequencing data. *Bioinformatics*. 2011;27:2987–93. [PubMed http://dx.doi.org/10.1093/bioinformatics/btr509](http://dx.doi.org/10.1093/bioinformatics/btr509)
4. Gouy M, Guindon S, Gascuel O. SeaView version 4: a multiplatform graphical user interface for sequence alignment and phylogenetic tree building. *Mol Biol Evol*. 2010;27:221–4. [PubMed http://dx.doi.org/10.1093/molbev/msp259](http://dx.doi.org/10.1093/molbev/msp259)
